# Supplementary material for: Monitoring nearshore ecosystem health using Pacific razor clams (Siliqua patula) as an indicator species
Source: PeerJ. 2020 Mar 5;8:e8761. doi: 10.7717/peerj.8761 (PMC7060925; doi:10.7717/peerj.8761)
Supplement: Supplemental Information 3 [file peerj-08-8761-s003.csv]

Year	Park	Site	Field ID	Condition Factor	Shellthickness	Avg Hemocyte Count	Avg H2O2	RNADNA	P450	HSP40
2015	LACL	Chinitna Bay	LAC-CH-SIP-11			43.66666667	0.051966667	9.182837415	74.12917228	1.712838266
2015	LACL	Chinitna Bay	LAC-CH-SIP-12			19.83333333	0.05985	9.485175966	78.11293033	1.163580284
2015	LACL	Chinitna Bay	LAC-CH-SIP-13			21.33333333	0.034633333	38.79824946	66.09300489	0.81153975
2015	LACL	Chinitna Bay	LAC-CH-SIP-14			13.5	0.0632	15.21419165	50.5086592
2015	LACL	Chinitna Bay	LAC-CH-SIP-15			10	0.067333333	19.8376899	46.27546898	1.088675444
2015	LACL	Chinitna Bay	LAC-CH-SIP-16			27.33333333	0.04095	3.402653716	50.86117606	1.26337893
2015	LACL	Chinitna Bay	LAC-CH-SIP-17			35.66666667		37.73474461	60.82310141	0.485146573
2015	LACL	Chinitna Bay	LAC-CH-SIP-18			10.33333333	0.0562	36.87856733	50.83414774	1.686388293
2015	LACL	Chinitna Bay	LAC-CH-SIP-19			16.5	0.082933333	0.632107691	36.5763865	0.250041952
2015	LACL	Chinitna Bay	LAC-CH-SIP-20			28.5	0.0245	68.99694282	45.47904903	0.14084042
2016	LACL	Chinitna Bay	LAC-CH-SIP-1	0.885331477	0.3464	6.333333333	0.06815	83.06344877	132.9461304	3.398919562
2016	LACL	Chinitna Bay	LAC-CH-SIP-10	1.271802433	0.275	23.16666667	0.0843	84.72460137	26.11735884	1.614559693
2016	LACL	Chinitna Bay	LAC-CH-SIP-2	1.908654454	0.7846	28.66666667	0.0448	174.0731805	62.36792905	2.5501085
2016	LACL	Chinitna Bay	LAC-CH-SIP-3	0.994444444	0.3312	14.66666667		169.4042821	33.35437837	7.141866762
2016	LACL	Chinitna Bay	LAC-CH-SIP-4	0.65995995	0.2578	15.83333333	0.0584	149.2104287	37.85837765
2016	LACL	Chinitna Bay	LAC-CH-SIP-5	1.026699234	0.2982	25.66666667	0.072366667	146.4737789	36.66230346
2016	LACL	Chinitna Bay	LAC-CH-SIP-6	1.112117954	0.317	13.16666667	0.06925	176.4886531	21.68737959	1.348107174
2016	LACL	Chinitna Bay	LAC-CH-SIP-7	1.426821586	0.3912	107.1666667	0.05825	151.5447218	16.72539373	0.545752724
2016	LACL	Chinitna Bay	LAC-CH-SIP-8	1.463317619	0.492	19.33333333	0.0629	92.85174654	31.15519887	0.218952416
2016	LACL	Chinitna Bay	LAC-CH-SIP-9	0.756833444	1.895833333	15	0.04285	82.28498188	39.7864786	1.996521629
2016	KATM	Hallo Bay	KAT-HAL-SIP-11	0.649740709	0.3404	1.166666667	0.0798	14.23492997	35.12503829	3.302718243
2016	KATM	Hallo Bay	KAT-HAL-SIP-12	0.072910824	0.147	39.4	0.025	136.9586535	51.76188726	4.145757761
2016	KATM	Hallo Bay	KAT-HAL-SIP-13	0.063686824	0.1506	16.33333333	0.024	309.9710403	62.45023876	2.863758068
2016	KATM	Hallo Bay	KAT-HAL-SIP-14	0.058771412	0.2174	4.666666667	0.0222	346.8613346	30.93664611	2.640909264
2016	KATM	Hallo Bay	KAT-HAL-SIP-15	0.054706601	0.1358	34.16666667	0.02535	361.234181	46.88738205	2.077137283
2016	KATM	Hallo Bay	KAT-HAL-SIP-16	0.059664559	0.2992	4.166666667	0.05245	448.9513728	55.35503955	0
2016	KATM	Hallo Bay	KAT-HAL-SIP-17	0.077802091	0.1778	10.33333333	0.0367	218.5767722	38.07831879	2.733952889
2016	KATM	Hallo Bay	KAT-HAL-SIP-18	0.400770938	0.3916	5.666666667	0.0418	62.11525598	52.52762448	0.490529244
2016	KATM	Hallo Bay	KAT-HAL-SIP-19	0.082023968	0.4014	1.666666667	0.0399	408.2489511	19.29096771
2016	KATM	Hallo Bay	KAT-HAL-SIP-20	0.072611095	0.3052	7.166666667		333.8946907	17.32472833
2016	KATM	Hallo Bay	KAT-HAL-SIP-21	0.057242252	0.1332	2.666666667		428.9965221	67.74732426	1.33724854
2016	KATM	Hallo Bay	KAT-HAL-SIP-22	0.051154529	0.136	40.83333333		164.5294716	54.30706101	1.158804379
2015	KATM	Kashvik	KAT-KA-SIP-11-15	0.245594885	0.3738	52.33333333	0.04195	54.41099917	28.12949165	0.069822886
2015	KATM	Kashvik	KAT-KA-SIP-12-15	0.264993026	0.4438	10.33333333	0.0341	117.7101221	34.29205256	0.301525705
2015	KATM	Kashvik	KAT-KA-SIP-13-15	0.235787355	0.4432	26.4	0.0919	265.1927501	35.3078062	0.17614151
2015	KATM	Kashvik	KAT-KA-SIP-14-15	0.185649547	0.2044	33.16666667	0.07405	27.89490322	45.40144076	0.145898392
2015	KATM	Kashvik	KAT-KA-SIP-15-15	0.286309438	0.3366	49.4	0.0725	35.96226027	46.13187081	1.649701342
2015	KATM	Kashvik	KAT-KA-SIP-16-15	0.291413835	0.3314	58.33333333	0.0491	43.64562423	40.93528363	0.25564293
2015	KATM	Kashvik	KAT-KA-SIP-17-15	0.116960352	0.2314	47.83333333	0.053666667	32.79427127	60.79767818	0
2015	KATM	Kashvik	KAT-KA-SIP-18-15	0.289863843	0.4784	15.16666667	0.0437	24.10481274	22.66419231	0
2015	KATM	Kashvik	KAT-KA-SIP-19-15	0.127888232	0.1652	6.333333333	0.05265	27.49759913	17.91160111	1.220063379
2015	KATM	Kashvik	KAT-KA-SIP-20-15	0.128513146	0.288	15.16666667	0.1176	37.77860295	64.51087802	0.378989525
2016	KATM	Kashvik	KAT-KA-SIP-11	0.136898228	0.17	19.33333333	0.0444	249.796082	27.64163729	4.068735389
2016	KATM	Kashvik	KAT-KA-SIP-12	0.11499799	0.4764	12.83333333	0.0138	51.80862707	13.10636492	3.924293022
2016	KATM	Kashvik	KAT-KA-SIP-13	0.5218817	0.7776	7.166666667	0.057166667	19.09178218	55.50505651	7.869688478
2016	KATM	Kashvik	KAT-KA-SIP-14	0.115683047	0.2164	33	0.042766667	326.4017424	41.56366583	3.350942438
2016	KATM	Kashvik	KAT-KA-SIP-15	0.464636035	0.3328	4.666666667	0.0506	42.07460487	45.33678821	1.948914659
2016	KATM	Kashvik	KAT-KA-SIP-16	0.136625332	0.5192	10.83333333	0.0365	106.1412559	21.6793135	0.98942433
2016	KATM	Kashvik	KAT-KA-SIP-17	0.655791962	0.7284	4.5	0.051066667	27.74494255	46.14991398
2016	KATM	Kashvik	KAT-KA-SIP-18	0.105453002	0.1708	1.833333333	0.03895	82.9906786	29.3739457	1.263310968
2016	KATM	Kashvik	KAT-KA-SIP-19	0.394092728	0.5332	9.833333333	0.030966667	29.83628881	20.71854766	2.53489385
2016	KATM	Kashvik	KAT-KA-SIP-20	0.133225955	0.21	14.5	0.0401	128.2226527	51.98335858	3.006277703
2016	KATM	Kashvik	KAT-KA-SIP-21	0.114102847	0.1796	3.333333333	0.03975	57.1195452	23.42921769	1.718037975
2016	KATM	Kashvik	KAT-KA-SIP-22	0.079958995	0.1874	11.5	0.03875	62.05687029	51.52285897
2015	LACL	Polly Creek	LAC-PO-SIP-11			7.166666667	0.02835	90.46599235	96.53050297	0.967993313
2015	LACL	Polly Creek	LAC-PO-SIP-12			3.333333333		84.43415297	63.14176185	1.477646216
2015	LACL	Polly Creek	LAC-PO-SIP-13			3.5	0.031233333	39.86916257	79.20180798	1.000399355
2015	LACL	Polly Creek	LAC-PO-SIP-14			2	0.036033333	34.75675066	48.27390267	2.556890146
2015	LACL	Polly Creek	LAC-PO-SIP-15			29.5		35.43367974	54.07485934	0.87658922
2015	LACL	Polly Creek	LAC-PO-SIP-16			8.333333333	0.0226	29.01330925	51.55872991	1.120329988
2015	LACL	Polly Creek	LAC-PO-SIP-17			2	0.02515	15.84506638	25.81817506	1.89028591
2015	LACL	Polly Creek	LAC-PO-SIP-18			9.166666667	0.0232	13.79576155	54.85018393	0.008309087
2015	LACL	Polly Creek	LAC-PO-SIP-19			4.5	0.048433333	36.36846255	44.43291798	0.336564944
2015	LACL	Polly Creek	LAC-PO-SIP-20			4.333333333	0.03595	99.52180261	40.09923428	0.518612126
2016	LACL	Polly Creek	LAC-PO-SIP-1	1.088040265	0.5512	22	0.03495	117.8177572	99.49632893	1.219912311
2016	LACL	Polly Creek	LAC-PO-SIP-10	0.727871552	0.6052	6.5	0.01675	40.43590144	26.20671344
2016	LACL	Polly Creek	LAC-PO-SIP-2	0.687960906	0.2842	8.333333333	0.03	85.22714326	38.01522113	1.044206623
2016	LACL	Polly Creek	LAC-PO-SIP-3	0.794800629	0.2804	11.33333333	0.03115	20.0247387	32.66068848	0.390607056
2016	LACL	Polly Creek	LAC-PO-SIP-4	1.346243488	0.7924	10.33333333	0.03735	89.39723023	63.31730254	2.376832493
2016	LACL	Polly Creek	LAC-PO-SIP-5	0.754287222	0.4734	11	0.03855	152.6623843	68.06676603	3.570362948
2016	LACL	Polly Creek	LAC-PO-SIP-6	0.801362398	0.4874	8.166666667	0.05225	121.4575735	136.8093304	3.463124283
2016	LACL	Polly Creek	LAC-PO-SIP-7	0.788784877	0.4346	4.666666667	0.0446	61.69281746	69.02143191	4.637014517
2016	LACL	Polly Creek	LAC-PO-SIP-8	0.691229088	0.4284	3.666666667	0.0283	109.2314903	89.54320239	3.377077673
2016	LACL	Polly Creek	LAC-PO-SIP-9	0.936772329	0.4046	24.5	0.01705	46.45689275	63.14083535	2.414534559
2015	LACL	Silver Salmon	LAC-SS-SIP-11	0.988054478	0.476	2.666666667	0.090133333	9.875082634	46.65855728	1.325926732
2015	LACL	Silver Salmon	LAC-SS-SIP-12	1.021435809	0.5096	163.5	0.11125	14.36456773	39.09370116	1.671492177
2015	LACL	Silver Salmon	LAC-SS-SIP-13	0.803092157	0.4316	9.166666667		11.68363431	29.92044073	0.753894705
2015	LACL	Silver Salmon	LAC-SS-SIP-14	0.678134557	0.5358	8.5	0.0524	4.914724129	43.2382002	1.237078161
2015	LACL	Silver Salmon	LAC-SS-SIP-15	0.877634743	0.5932	2	0.0755	6.66522508	95.82446421	1.494469014
2015	LACL	Silver Salmon	LAC-SS-SIP-16	0.858776218	0.4496	4.833333333	0.0732	5.72446201	36.13842898	1.231576066
2015	LACL	Silver Salmon	LAC-SS-SIP-17	0.886452689	0.5014	4.666666667	0.054733333	12.43737919	38.78347843	0.212994125
2015	LACL	Silver Salmon	LAC-SS-SIP-18	1.103709642	0.59	9.6	0.0348	32.99357192	31.39419015	0.571338686
2015	LACL	Silver Salmon	LAC-SS-SIP-19	1.137742453	0.6424	17	0.053066667	14.81669791	51.65618804	0.410433129
2015	LACL	Silver Salmon	LAC-SS-SIP-20	0.944542864	0.4094	3	0.0549	9.181996622	24.17190473	0.381543611
2016	LACL	Silver Salmon	LAC-SS-SIP-1	1.221838489	0.6136	9.333333333	0.078033333	38.0863228	30.06723506	0.59116472
2016	LACL	Silver Salmon	LAC-SS-SIP-10	0.623577874	0.3742	4.666666667	0.039	102.3800719	88.42189654	2.4474582
2016	LACL	Silver Salmon	LAC-SS-SIP-2	0.999928166	0.701	5.666666667		185.9498042	63.24172507	2.396114032
2016	LACL	Silver Salmon	LAC-SS-SIP-3	0.846591399	0.4198	9.333333333	0.0679	147.6551144	24.0773842	9.868328636
2016	LACL	Silver Salmon	LAC-SS-SIP-4	0.592629187	0.3234	5.333333333	0.07325	172.6419852	57.01844547	1.192976406
2016	LACL	Silver Salmon	LAC-SS-SIP-5	1.194790137	0.7542	9.166666667	0.047433333	60.04090486	57.68065838	0.675176388
2016	LACL	Silver Salmon	LAC-SS-SIP-6	0.4619676	0.2472	9.666666667	0.061133333	166.0749066	17.15045423
2016	LACL	Silver Salmon	LAC-SS-SIP-7	0.40200491	0.3802	9	0.06615	260.6157454	60.95261823
2016	LACL	Silver Salmon	LAC-SS-SIP-8	0.456541947	0.3876	4.833333333	0.050633333	28.72792625	88.90220434	0.918261012
2016	LACL	Silver Salmon	LAC-SS-SIP-9	0.693967584	0.357	10.2		165.2540331	107.8690856	17.7855869
2015	KATM	Swikshak	KAT-SW-SIP-11-15	0.281354849	0.3546	9.666666667	0.0543	41.41080809	13.29297076	1.524281363
2015	KATM	Swikshak	KAT-SW-SIP-12-15	0.238902923	0.41	11.16666667		25.45922283	78.37094952	1.137818954
2015	KATM	Swikshak	KAT-SW-SIP-13-15	0.227913534	0.2792	88.83333333		92.98045051	39.01407584	2.732146796
2015	KATM	Swikshak	KAT-SW-SIP-14-15	0.340257171	0.3908	15.66666667	0.1053	19.50999382	32.23722707	1.026621899
2015	KATM	Swikshak	KAT-SW-SIP-15-15	0.295728039	0.279	16	0.1232	43.06765703	25.1790889	0.542250487
2015	KATM	Swikshak	KAT-SW-SIP-16-15	0.36879953	0.3644	11	0.0409	38.05870707	68.02130353	0.771832732
2015	KATM	Swikshak	KAT-SW-SIP-17-15	0.316708974	0.1822	8.666666667	0.11155	37.63086171	43.05617729	0.389186692
2015	KATM	Swikshak	KAT-SW-SIP-18-15	0.337256677	0.4816	5	0.0837	48.7483904	23.06795135	0.176039724
2015	KATM	Swikshak	KAT-SW-SIP-19-15	0.237014471	0.2258	16.66666667	0.07975	76.43866412	38.43866174	0.390287925
2015	KATM	Swikshak	KAT-SW-SIP-20-15	0.319684336	0.238	2.5	0.0881	34.47534008	71.47167409	2.15395312
2015	KATM	Swikshak	KAT-SW-SIP-21	0.294108073	0.3594	3.5	0.09085	33.5187574	28.4663381	0.809078939
2015	KATM	Swikshak	KAT-SW-SIP-22	0.281881731	0.3508	9.833333333	0.0719	42.75201142	72.81986561	0.528836019
2016	KATM	Swikshak	KAT-SW-SIP-11	0.363327313	0.5378	21	0.1114	141.3041716	24.25344768	1.151620626
2016	KATM	Swikshak	KAT-SW-SIP-12	0.471224411	0.6774	11.33333333	0.0714	50.66419248	45.56831757	4.708036485
2016	KATM	Swikshak	KAT-SW-SIP-13	0.049395421	0.1132	2	0.0664	137.7252714	139.2539232	0.323651419
2016	KATM	Swikshak	KAT-SW-SIP-14	0.639660494	0.6262	6.166666667	0.04185	152.6454292	43.4550172	2.337728144
2016	KATM	Swikshak	KAT-SW-SIP-15	0.132539232	0.154	9.666666667	0.0424	289.6439142	104.6188973	5.474364207
2016	KATM	Swikshak	KAT-SW-SIP-16	0.089713481	0.1298	1	0.0716	318.3028244	146.3739551	6.359982179
2016	KATM	Swikshak	KAT-SW-SIP-17	0.262161085	0.1742	7.666666667	0.05825	454.0996923	86.88466885	2.476017059
2016	KATM	Swikshak	KAT-SW-SIP-18	0.117770035	0.181	55.83333333	0.0706	121.1726056	65.9999042	1.174663394
2016	KATM	Swikshak	KAT-SW-SIP-19	0.219507748	0.3592	0.666666667	0.04715	83.41646687	61.49694056	1.345017776
2016	KATM	Swikshak	KAT-SW-SIP-20	0.081179849	0.1548	13.83333333	0.0682	59.27898097	75.96521657	2.90735512
